# Supplementary material for: The role of cardiac biomarkers for predicting left ventricular dysfunction and cardiovascular mortality in acute exacerbations of COPD
Source: HighWire-hosted journal article supplement (doi:10.1136/openhrt-2014-000052), 2015-03-01
Supplement: openhrt-2014-000052supp.pdf [file openhrt-2014-000052supp.pdf]

Appendix I – Outcome-level risk of bias analysis for all included studies

| <b>Study</b>                           | <b>Biomarker</b> | <b>Outcome</b>             | <b>Overall Domain 1</b> | <b>Overall Domain 2</b> | <b>Overall Domain 3</b> | <b>Overall domain 4</b> |
|----------------------------------------|------------------|----------------------------|-------------------------|-------------------------|-------------------------|-------------------------|
| <b>Marcun R <i>et al.</i> 2012 [3]</b> | NT-proBNP        | 6 month Mortality          | low risk                | unclear                 | n/a                     | low risk                |
| <b>Marcun R <i>et al.</i> 2012 [3]</b> | NT-proBNP        | Hospitalisation            | low risk                | unclear                 | n/a                     | low risk                |
| <b>Marcun R <i>et al.</i> 2012 [3]</b> | Troponin T       | 6 month Mortality          | low risk                | unclear                 | n/a                     | low risk                |
| <b>Marcun R <i>et al.</i> 2012 [3]</b> | Troponin T       | Hospitalisation            | low risk                | unclear                 | n/a                     | low risk                |
| <b>Chang <i>et al.</i> 2011 [10]</b>   | NT-proBNP        | 30-day mortality           | low risk                | low risk                | n/a                     | low risk                |
| <b>Chang <i>et al.</i> 2011 [10]</b>   | Troponin T       | 30-day mortality           | low risk                | low risk                | n/a                     | low risk                |
| <b>Chang <i>et al.</i> 2011 [10]</b>   | NT-proBNP        | 30-day to 1 year mortality | low risk                | low risk                | n/a                     | low risk                |
| <b>Chang <i>et al.</i> 2011 [10]</b>   | Troponin T       | 30-day to 1 year mortality | low risk                | low risk                | n/a                     | low risk                |
| <b>Stolz <i>et al.</i> 2008 [13]</b>   | BNP              | 2 year mortality           | low risk                | high risk               | n/a                     | low risk                |
| <b>Stolz <i>et al.</i> 2008 [11]</b>   | BNP              | intensive care admission   | low risk                | high risk               | n/a                     | low risk                |
| <b>Stolz <i>et al.</i> 2008 [11]</b>   | BNP              | in-hospital mortality      | low risk                | high risk               | n/a                     | low risk                |

|                                                     |                       |                                                                   |                |                |          |          |
|-----------------------------------------------------|-----------------------|-------------------------------------------------------------------|----------------|----------------|----------|----------|
| <b>Høiseth<br/><i>et al.</i><br/>2012<br/>[15]</b>  | NT-proBNP             | long-term<br>mortality                                            | low risk       | high risk      | n/a      | low risk |
| <b>Ouanes<br/><i>et al.</i><br/>2012<br/>[12]</b>   | NT-proBNP             | LV dysfunction<br>diagnosis                                       | low risk       | low risk       | low risk | low risk |
| <b>Gariani<br/><i>et al.</i><br/>2011<br/>[13]</b>  | BNP                   | diagnosis of<br>LVD                                               | medium<br>risk | medium<br>risk | low risk | low      |
| <b>Abroug<br/><i>et al.</i><br/>2006<br/>[14]</b>   | NT-proBNP             | diagnosis of<br>LVD (or<br>exclusion)                             | low risk       | medium<br>risk | low risk | low risk |
| <b>Abroug<br/><i>et al.</i><br/>2006<br/>[14]</b>   | Troponin T            | diagnosis of<br>LVD (or<br>exclusion)                             | low risk       | low risk       | low risk | low risk |
| <b>Baillard<br/><i>et al.</i><br/>2002<br/>[17]</b> | Troponin I            | in-hospital<br>mortality                                          | low risk       | low risk       | n/a      | low risk |
| <b>Brekke<br/><i>et al.</i><br/>2009<br/>[18]</b>   | cTnT                  | mortality                                                         | low risk       | low risk       | n/a      | low risk |
| <b>Fruchter<br/><i>et al.</i><br/>2009<br/>[19]</b> | Troponin I            | mortality<br>following<br>discharge from<br>hospital              | low risk       | low risk       | n/a      | low risk |
| <b>Høiseth<br/><i>et al.</i><br/>2012<br/>[21]</b>  | cardiac<br>Troponin T | mortality until<br>end of study<br>(mean follow-<br>up 1.9 years) | low risk       | low risk       | n/a      | low risk |

|                                                    |                                                           |                                         |          |           |          |          |
|----------------------------------------------------|-----------------------------------------------------------|-----------------------------------------|----------|-----------|----------|----------|
| <b>Høiseth<br/><i>et al.</i><br/>2012<br/>[22]</b> | cardiac<br>Troponin T                                     | survival                                | low risk | high risk | n/a      | low risk |
| <b>Martins<br/><i>et al.</i><br/>2009<br/>[20]</b> | cardiac<br>Troponin I                                     | 18-month<br>survival                    | low risk | low risk  | n/a      | low risk |
| <b>Harvey <i>et al.</i> 2004<br/>[16]</b>          | "serum<br>troponin" -<br>looked at<br>both TnI<br>and TnT | increased<br>length of<br>hospital stay | low risk | low risk  | low risk | low risk |
